# Supplementary material for: Design of core–shell phosphors with tunable luminescence and improved thermal stability by coating with g-C3N4
Source: Royal Society of Chemistry journal article supplement (doi:10.1039/d0qi00498g), 2020-01-01
Supplement: d0qi00498g1.pdf [file d0qi00498g1.pdf]

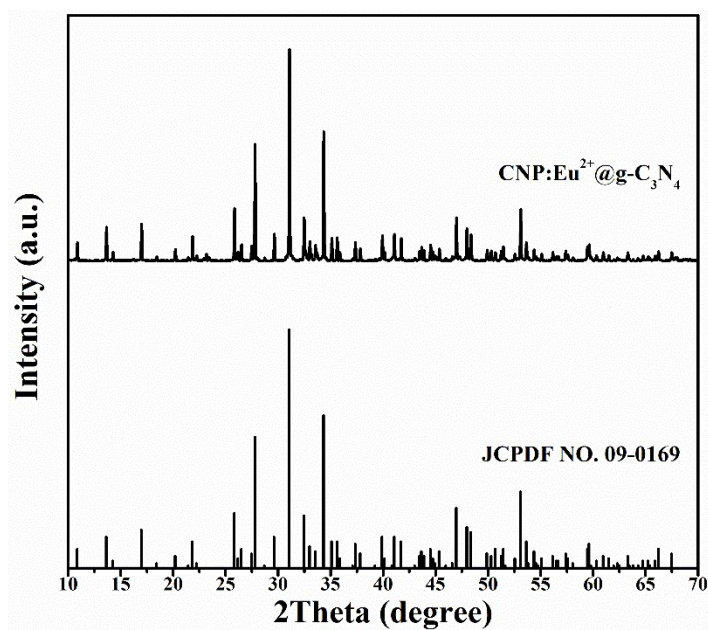

Figure S1 XRD pattern of the CNP:Eu<sup>2+</sup>@g-C<sub>3</sub>N<sub>4</sub> and standard card of  $\beta$ -Ca<sub>3</sub>PO<sub>4</sub> (JCPDS NO.09-0169).
